# Supplementary material for: Mendelian Randomization Analysis Provides Insights into the Pathogenesis of Serum Levels of Branched-Chain Amino Acids in Cardiovascular Disease
Source: Metabolites. 2023 Mar 9;13(3):403. doi: 10.3390/metabo13030403 (PMC10059809; doi:10.3390/metabo13030403)
Supplement: Supplementary file 1 [file metabolites-13-00403-s001.zip › Supplemetary_data_1_IVs_V2.xlsx]

## Sheet: Sheet1
Supplementary Data 1.Characteristics of all branched-chain amino acid-associated genetic variants.
chromosome	position	SNP	effect_allele	other_allele	eaf	beta	se	pvalue	animo_exposure
4	89203042	rs881561	A	G	0.377064	0.074208	0.009907	9.42e-14	isoleucine
4	89226747	rs1440580	A	T	0.481233	0.072612	0.00941	1.68e-14	isoleucine
4	89181841	rs17789027	G	A	0.384168	0.072549	0.009544	4.06e-14	isoleucine
4	89195540	rs34752329	A	G	0.369538	0.072497	0.009656	8.25e-14	isoleucine
2	27753878	rs4665985	C	A	0.253207	0.072031	0.010998	7.38e-11	isoleucine
4	89223504	rs10014755	G	A	0.491579	0.071391	0.00929	2.14e-14	isoleucine
2	27934731	rs6727215	A	G	0.198294	0.071069	0.011528	8.76e-10	isoleucine
2	27892023	rs2272406	T	A	0.195779	0.070548	0.011591	1.43e-09	isoleucine
2	27950837	rs10432705	A	G	0.201893	0.070518	0.011564	1.33e-09	isoleucine
2	27933642	rs4616435	T	C	0.199025	0.070252	0.011467	1.12e-09	isoleucine
2	27932587	rs6727388	G	A	0.199049	0.070233	0.011465	1.12e-09	isoleucine
4	89192792	rs6821589	G	A	0.378982	0.070232	0.009507	2.04e-13	isoleucine
2	27901728	rs13021208	T	C	0.197797	0.069831	0.011505	1.59e-09	isoleucine
4	89193640	rs17789147	G	C	0.379746	0.069788	0.00949	2.62e-13	isoleucine
2	27913188	rs12998770	C	T	0.198274	0.069622	0.011484	1.66e-09	isoleucine
4	89197519	rs6819344	A	C	0.379818	0.0696	0.009481	2.87e-13	isoleucine
4	89201376	rs2869926	T	C	0.379987	0.069594	0.009458	2.54e-13	isoleucine
2	27910706	rs13023094	C	A	0.198172	0.069539	0.011487	1.75e-09	isoleucine
4	89210312	rs6838172	A	G	0.319886	0.069461	0.009952	3.91e-12	isoleucine
4	89225171	rs10018448	G	A	0.498546	0.069382	0.009276	1.03e-13	isoleucine
4	89226422	rs1440581	C	T	0.496419	0.069192	0.009268	1.14e-13	isoleucine
4	89203670	rs893971	G	A	0.379698	0.069057	0.00946	3.89e-13	isoleucine
4	89201007	rs7661312	G	T	0.468631	0.06901	0.009904	4.24e-12	isoleucine
4	89229337	rs1899132	A	G	0.49597	0.068792	0.009249	1.4e-13	isoleucine
4	89222827	rs7678928	T	C	0.425473	0.068664	0.009406	3.89e-13	isoleucine
4	89207156	rs7680307	C	T	0.259454	0.068554	0.011675	5.26e-09	isoleucine
4	89204093	rs17732955	T	C	0.295441	0.068545	0.010725	2.08e-10	isoleucine
4	89206756	rs4423843	G	A	0.380335	0.0684	0.009467	6.75e-13	isoleucine
2	28003174	rs13030345	T	G	0.191297	0.068026	0.011835	1.09e-08	isoleucine
4	89187068	rs4693209	C	G	0.469611	0.067844	0.00926	3.21e-13	isoleucine
2	27854524	rs34502053	A	G	0.241766	0.067498	0.010689	3.4e-10	isoleucine
2	28066122	rs74446114	C	T	0.183422	0.067309	0.012106	3.22e-08	isoleucine
4	89188993	rs6843634	A	G	0.426353	0.067243	0.009366	9.4e-13	isoleucine
2	27967260	rs13023194	C	G	0.190691	0.067136	0.011866	1.84e-08	isoleucine
2	27851918	rs3749147	A	G	0.241103	0.066979	0.010696	4.75e-10	isoleucine
2	27853245	rs13002853	G	C	0.243854	0.066951	0.010709	5.07e-10	isoleucine
4	89208565	rs4693210	G	A	0.426652	0.066744	0.00933	1.13e-12	isoleucine
2	27761436	rs4665988	A	C	0.268058	0.066717	0.010443	2.11e-10	isoleucine
4	89196821	rs7656367	G	A	0.469107	0.066594	0.009209	6.44e-13	isoleucine
2	27928797	rs13030973	C	T	0.199879	0.066534	0.011988	3.41e-08	isoleucine
4	89206230	rs9637599	C	A	0.469335	0.066261	0.009206	8.24e-13	isoleucine
4	89210605	rs13128713	C	T	0.36603	0.066083	0.009556	6.13e-12	isoleucine
4	89234812	rs1808859	C	T	0.390965	0.06607	0.00969	1.2e-11	isoleucine
2	27765587	rs12473139	C	T	0.281238	0.066059	0.010209	1.24e-10	isoleucine
2	27766284	rs4665991	A	G	0.279412	0.065954	0.010224	1.41e-10	isoleucine
2	27755825	rs4665987	A	G	0.281742	0.06593	0.010196	1.27e-10	isoleucine
2	27840640	rs4666002	C	G	0.274784	0.065927	0.010198	1.29e-10	isoleucine
4	89225088	rs9995984	G	C	0.445438	0.065888	0.009394	3.07e-12	isoleucine
2	27836605	rs13020949	T	C	0.274643	0.065633	0.010203	1.59e-10	isoleucine
4	89223058	rs13151250	A	G	0.328733	0.065568	0.009849	3.59e-11	isoleucine
4	89224337	rs11931633	A	C	0.328477	0.065526	0.009854	3.79e-11	isoleucine
4	89224185	rs28375859	A	G	0.328512	0.065522	0.009857	3.84e-11	isoleucine
4	89234709	rs1808860	C	T	0.435913	0.065522	0.00953	8.09e-12	isoleucine
4	89220352	rs28504612	A	G	0.328394	0.065497	0.009834	3.52e-11	isoleucine
4	89214071	rs7655241	A	G	0.365537	0.065441	0.009571	1.05e-11	isoleucine
4	89213077	rs34813495	G	A	0.365833	0.065432	0.009563	1.02e-11	isoleucine
2	27834152	rs12987055	C	T	0.274583	0.065427	0.010205	1.83e-10	isoleucine
2	27833687	rs34016998	T	C	0.274557	0.065392	0.010207	1.88e-10	isoleucine
2	27778167	rs12995461	C	A	0.278325	0.065385	0.010234	2.11e-10	isoleucine
4	89219645	rs10024717	A	G	0.329015	0.065369	0.009835	3.87e-11	isoleucine
2	27827092	rs12464616	T	C	0.277	0.065313	0.010265	2.5e-10	isoleucine
2	27825715	rs12467476	C	T	0.274736	0.065251	0.010256	2.51e-10	isoleucine
4	89233276	rs1975394	T	C	0.470479	0.065204	0.009331	3.7e-12	isoleucine
2	27832055	rs2384656	G	A	0.27532	0.065199	0.010243	2.46e-10	isoleucine
2	27833502	rs74175068	C	T	0.275059	0.065168	0.010197	2.09e-10	isoleucine
2	27783801	rs4665382	C	T	0.276692	0.065121	0.010229	2.44e-10	isoleucine
4	89232772	rs28762810	T	G	0.470409	0.065085	0.009319	3.78e-12	isoleucine
2	27801759	rs1919128	G	A	0.274895	0.065029	0.010264	2.98e-10	isoleucine
2	27821482	rs12989678	T	C	0.275425	0.064945	0.010247	2.94e-10	isoleucine
2	27778560	rs10169065	G	A	0.279009	0.064919	0.010241	2.91e-10	isoleucine
2	27817817	rs13010586	A	G	0.275421	0.064895	0.01025	3.06e-10	isoleucine
4	89231404	rs4693947	G	A	0.470831	0.064864	0.009296	3.95e-12	isoleucine
2	27815510	rs13022873	C	A	0.275305	0.064861	0.010254	3.18e-10	isoleucine
4	89215816	rs28406500	C	G	0.364722	0.064857	0.009601	1.85e-11	isoleucine
2	27811722	rs12478841	G	A	0.276552	0.064819	0.010293	3.81e-10	isoleucine
2	27812252	rs6760250	A	G	0.27523	0.064767	0.010257	3.41e-10	isoleucine
2	27859351	rs6719175	A	T	0.267299	0.064611	0.010471	8.46e-10	isoleucine
2	27784658	rs7570476	T	C	0.277889	0.064598	0.010219	3.26e-10	isoleucine
2	27793921	rs7577311	T	G	0.277471	0.064445	0.010209	3.45e-10	isoleucine
4	89228383	rs7660693	C	T	0.466829	0.064429	0.009289	5.3e-12	isoleucine
2	27791555	rs4665383	G	C	0.276938	0.064373	0.010222	3.8e-10	isoleucine
2	27778572	rs10179872	A	G	0.278888	0.064371	0.010217	3.73e-10	isoleucine
4	89211522	rs6845249	T	C	0.369055	0.064327	0.009552	2.13e-11	isoleucine
4	89228928	rs6841731	A	G	0.470427	0.064312	0.009263	5.05e-12	isoleucine
2	27786188	rs10208529	T	A	0.277721	0.064234	0.010216	4.05e-10	isoleucine
2	27801493	rs1919127	C	T	0.279981	0.064067	0.010653	2.23e-09	isoleucine
4	89209681	rs958325	T	C	0.455612	0.064022	0.009249	5.86e-12	isoleucine
4	89233397	rs1975393	T	C	0.478428	0.063902	0.009362	1.14e-11	isoleucine
4	89232572	rs1595910	T	C	0.373586	0.063597	0.009653	5.69e-11	isoleucine
4	89230502	rs28789746	C	T	0.373417	0.063382	0.009621	5.73e-11	isoleucine
2	27839539	rs2068834	C	T	0.294338	0.062978	0.010016	4.04e-10	isoleucine
2	27839369	rs4666000	C	T	0.29422	0.062939	0.010015	4.12e-10	isoleucine
4	89234053	rs11945820	G	A	0.323666	0.062906	0.009998	3.93e-10	isoleucine
4	89227121	rs17789621	T	C	0.323106	0.062874	0.009905	2.75e-10	isoleucine
4	89231823	rs28884607	A	G	0.323392	0.062573	0.009955	4.1e-10	isoleucine
4	89227918	rs7677533	A	G	0.323312	0.06256	0.009904	3.36e-10	isoleucine
4	89231955	rs6532063	C	T	0.324188	0.06247	0.009963	4.52e-10	isoleucine
4	89231125	rs9998450	C	G	0.323361	0.062469	0.009942	4.15e-10	isoleucine
4	89232425	rs1595911	A	C	0.323869	0.062369	0.009966	4.88e-10	isoleucine
4	89235870	rs28504259	G	C	0.331192	0.061346	0.010044	1.25e-09	isoleucine
2	27711893	rs1260327	G	A	0.492758	-0.054026	0.00921	5.45e-09	isoleucine
2	27619049	rs1083864	G	C	0.456295	-0.054825	0.009296	4.5e-09	isoleucine
2	27625661	rs1260338	G	A	0.456007	-0.055294	0.009348	4.06e-09	isoleucine
2	27556721	rs3739095	A	G	0.460364	-0.055577	0.00924	2.22e-09	isoleucine
2	27648726	rs4665978	C	T	0.458236	-0.05572	0.009237	1.99e-09	isoleucine
2	27651375	rs2303370	T	C	0.457963	-0.055887	0.009242	1.82e-09	isoleucine
2	27649929	rs1728911	G	T	0.450458	-0.055929	0.009335	2.56e-09	isoleucine
2	27568871	rs10205592	C	T	0.459763	-0.056107	0.009313	2.08e-09	isoleucine
2	27584666	rs7586601	G	A	0.461894	-0.057594	0.009297	7.27e-10	isoleucine
2	27750546	rs2911711	A	T	0.553096	-0.057879	0.009877	5.65e-09	isoleucine
2	27684957	rs780108	C	T	0.468656	-0.058313	0.009208	3.02e-10	isoleucine
2	27685388	rs780110	A	G	0.468238	-0.058432	0.009202	2.72e-10	isoleucine
2	27678471	rs780105	G	A	0.469265	-0.058716	0.009223	2.44e-10	isoleucine
2	27748597	rs1260334	A	C	0.605659	-0.058919	0.009552	8.6e-10	isoleucine
2	27748904	rs1313566	A	G	0.593183	-0.059297	0.009289	2.18e-10	isoleucine
2	27748624	rs1260333	G	A	0.591191	-0.059319	0.009307	2.33e-10	isoleucine
2	27752871	rs6753534	T	C	0.594379	-0.059911	0.009426	2.62e-10	isoleucine
4	89194928	rs13125860	A	T	0.38969	-0.060578	0.009877	1.07e-09	isoleucine
2	27734972	rs6547692	A	G	0.590223	-0.061195	0.009374	8.48e-11	isoleucine
2	27741072	rs780096	G	C	0.589267	-0.061533	0.009284	4.39e-11	isoleucine
2	27741105	rs780095	G	A	0.59094	-0.06156	0.009269	4.01e-11	isoleucine
2	27583156	rs6729709	A	G	0.425777	-0.064824	0.009758	3.96e-11	isoleucine
2	27752463	rs11127048	A	G	0.581561	-0.065129	0.009846	4.78e-11	isoleucine
2	27635463	rs1728918	G	A	0.741674	-0.066297	0.011107	2.93e-09	isoleucine
4	89183131	rs1129043	C	T	0.556736	-0.066937	0.009443	1.8e-12	isoleucine
4	89182518	rs7658173	C	T	0.644128	-0.07315	0.00974	8.14e-14	isoleucine
2	27742603	rs780093	C	T	0.636993	-0.077379	0.009459	4.11e-16	isoleucine
2	27598097	rs4665972	C	T	0.608778	-0.079877	0.009647	1.81e-16	isoleucine
2	27741237	rs780094	C	T	0.634381	-0.08071	0.009895	5e-16	isoleucine
2	27730940	rs1260326	C	T	0.638809	-0.085678	0.009934	9.75e-18	isoleucine
4	89194910	rs141413744	C	T	0.036711	-0.154299	0.026009	3.65e-09	isoleucine
2	26850923	rs138393787	A	G	0.011803	-0.319967	0.054115	4.11e-09	isoleucine
2	190243188	rs188890349	T	C	0.003157	-0.676605	0.123846	4.9e-08	leucine
2	26830858	rs117995694	A	C	0.004474	-0.441322	0.080594	4.57e-08	leucine
2	26850923	rs138393787	A	G	0.011827	-0.303387	0.054512	2.75e-08	leucine
4	89219170	rs145585828	A	C	0.016273	-0.233182	0.042122	3.25e-08	leucine
4	89194910	rs141413744	C	T	0.036694	-0.172734	0.026044	3.55e-11	leucine
4	89182518	rs7658173	C	T	0.644049	-0.1074	0.009732	3.08e-28	leucine
4	89183131	rs1129043	C	T	0.556602	-0.102754	0.009437	1.56e-27	leucine
4	89194928	rs13125860	A	T	0.389645	-0.089476	0.009878	1.5e-19	leucine
16	70368909	rs12325419	A	G	0.120221	-0.082062	0.014985	4.55e-08	leucine
2	27730940	rs1260326	C	T	0.638971	-0.079808	0.009937	1.07e-15	leucine
2	27741237	rs780094	C	T	0.634532	-0.074113	0.009903	7.9e-14	leucine
2	27598097	rs4665972	C	T	0.608963	-0.072488	0.009663	6.88e-14	leucine
2	27742603	rs780093	C	T	0.637136	-0.071961	0.009471	3.3e-14	leucine
2	27752463	rs11127048	A	G	0.581746	-0.061704	0.00987	4.32e-10	leucine
2	27741072	rs780096	G	C	0.589427	-0.053275	0.009306	1.09e-08	leucine
2	27741105	rs780095	G	A	0.591107	-0.053225	0.009292	1.07e-08	leucine
2	27748597	rs1260334	A	C	0.605868	-0.052569	0.009573	4.19e-08	leucine
2	27752871	rs6753534	T	C	0.594556	-0.051896	0.009454	4.23e-08	leucine
2	27748904	rs1313566	A	G	0.593356	-0.051161	0.009312	4.11e-08	leucine
4	89236735	rs893970	C	T	0.446964	0.078543	0.010164	1.2e-14	leucine
4	89233397	rs1975393	T	C	0.478627	0.087757	0.00937	8.66e-21	leucine
4	89228383	rs7660693	C	T	0.467065	0.089542	0.00929	6.34e-22	leucine
4	89228928	rs6841731	A	G	0.470674	0.090281	0.009262	2.18e-22	leucine
4	89231404	rs4693947	G	A	0.471077	0.090576	0.009302	2.4e-22	leucine
4	89232772	rs28762810	T	G	0.470657	0.090709	0.009325	2.65e-22	leucine
4	89233276	rs1975394	T	C	0.470728	0.090837	0.009338	2.63e-22	leucine
4	89230502	rs28789746	C	T	0.37357	0.091386	0.009622	2.45e-21	leucine
4	89232572	rs1595910	T	C	0.373741	0.091518	0.009654	2.92e-21	leucine
4	89234812	rs1808859	C	T	0.391109	0.092182	0.009699	2.3e-21	leucine
4	89229337	rs1899132	A	G	0.496108	0.093065	0.009258	1.04e-23	leucine
4	89235870	rs28504259	G	C	0.331242	0.093841	0.01004	1.04e-20	leucine
4	89226422	rs1440581	C	T	0.496561	0.094826	0.009271	1.74e-24	leucine
4	89225171	rs10018448	G	A	0.498693	0.095394	0.00928	1.02e-24	leucine
4	89231125	rs9998450	C	G	0.323457	0.09575	0.009936	6.43e-22	leucine
4	89231823	rs28884607	A	G	0.323486	0.095816	0.009949	6.84e-22	leucine
4	89219645	rs10024717	A	G	0.32911	0.095926	0.00983	1.96e-22	leucine
4	89232425	rs1595911	A	C	0.323966	0.096008	0.009962	6.38e-22	leucine
4	89234709	rs1808860	C	T	0.436077	0.096023	0.009532	8.43e-24	leucine
4	89227918	rs7677533	A	G	0.323407	0.096071	0.0099	3.35e-22	leucine
4	89231955	rs6532063	C	T	0.324282	0.09621	0.009958	5.03e-22	leucine
4	89226747	rs1440580	A	T	0.481387	0.096217	0.009417	1.94e-24	leucine
4	89234053	rs11945820	G	A	0.323762	0.09623	0.009991	6.77e-22	leucine
4	89227121	rs17789621	T	C	0.3232	0.096703	0.009897	1.73e-22	leucine
4	89225088	rs9995984	G	C	0.445563	0.09704	0.009393	5.96e-25	leucine
4	89223504	rs10014755	G	A	0.491712	0.097121	0.009293	1.7e-25	leucine
4	89220352	rs28504612	A	G	0.328488	0.097311	0.009831	4.9e-23	leucine
4	89223058	rs13151250	A	G	0.328827	0.098079	0.009845	2.59e-23	leucine
4	89224185	rs28375859	A	G	0.328599	0.098211	0.009853	2.44e-23	leucine
4	89224337	rs11931633	A	C	0.328568	0.09823	0.00985	2.33e-23	leucine
4	89209681	rs958325	T	C	0.45571	0.099511	0.009241	5.74e-27	leucine
4	89204093	rs17732955	T	C	0.295568	0.100083	0.01072	1.14e-20	leucine
4	89222827	rs7678928	T	C	0.425537	0.100105	0.009403	2.15e-26	leucine
4	89215816	rs28406500	C	G	0.364889	0.10012	0.0096	2.15e-25	leucine
4	89211522	rs6845249	T	C	0.369244	0.100505	0.00955	7.89e-26	leucine
4	89206230	rs9637599	C	A	0.469415	0.100506	0.009202	1.07e-27	leucine
4	89196821	rs7656367	G	A	0.469185	0.101082	0.009203	5.48e-28	leucine
4	89214071	rs7655241	A	G	0.365715	0.10112	0.009569	4.97e-26	leucine
4	89213077	rs34813495	G	A	0.366014	0.10117	0.009556	4.01e-26	leucine
4	89208565	rs4693210	G	A	0.426812	0.102018	0.009333	9.79e-28	leucine
4	89201007	rs7661312	G	T	0.468603	0.102025	0.009894	7.27e-25	leucine
4	89210605	rs13128713	C	T	0.366213	0.10204	0.009555	1.5e-26	leucine
4	89206756	rs4423843	G	A	0.380498	0.102667	0.009463	2.38e-27	leucine
4	89188993	rs6843634	A	G	0.42649	0.102829	0.009367	5.83e-28	leucine
4	89187068	rs4693209	C	G	0.469673	0.103138	0.009256	9.29e-29	leucine
4	89207156	rs7680307	C	T	0.259617	0.103185	0.011671	1.07e-18	leucine
4	89203670	rs893971	G	A	0.37986	0.103413	0.009457	9.33e-28	leucine
4	89197519	rs6819344	A	C	0.379979	0.103525	0.009477	1.06e-27	leucine
4	89201376	rs2869926	T	C	0.38015	0.103705	0.009455	6.47e-28	leucine
4	89210312	rs6838172	A	G	0.319997	0.103772	0.009948	2.08e-25	leucine
4	89193640	rs17789147	G	C	0.379909	0.103979	0.009486	6.99e-28	leucine
4	89192792	rs6821589	G	A	0.379137	0.104448	0.009504	5.07e-28	leucine
4	89195540	rs34752329	A	G	0.369673	0.105107	0.009652	1.53e-27	leucine
4	89181841	rs17789027	G	A	0.384329	0.108594	0.009541	6.16e-30	leucine
4	89203042	rs881561	A	G	0.377238	0.112197	0.009895	1.01e-29	leucine
4	89199397	rs116564150	A	G	0.012903	0.305515	0.045025	1.25e-11	leucine
4	89219170	rs145585828	A	C	0.016235	-0.247027	0.042019	4.24e-09	valine
4	89194910	rs141413744	C	T	0.036567	-0.1978	0.025947	2.59e-14	valine
4	89182518	rs7658173	C	T	0.644288	-0.114287	0.009696	4.93e-32	valine
4	89183131	rs1129043	C	T	0.556751	-0.112689	0.009408	5.07e-33	valine
4	89194928	rs13125860	A	T	0.389348	-0.102024	0.009838	3.65e-25	valine
2	65207902	rs17669826	G	C	0.173194	-0.086168	0.012979	3.27e-11	valine
4	89149144	rs7655059	G	C	0.217667	-0.068459	0.011163	8.91e-10	valine
4	89147993	rs2127864	G	A	0.217534	-0.068312	0.011163	9.67e-10	valine
4	89143340	rs6811890	T	A	0.218302	-0.067405	0.011152	1.55e-09	valine
4	89151397	rs11736552	A	G	0.691785	-0.05748	0.010057	1.12e-08	valine
17	7111624	rs178471	C	T	0.599278	0.055293	0.009484	5.69e-09	valine
17	7113222	rs125651	A	G	0.599531	0.056394	0.009429	2.29e-09	valine
17	7133609	rs2074216	A	G	0.400104	0.056659	0.009605	3.76e-09	valine
17	7132192	rs72839770	T	C	0.395979	0.057887	0.00959	1.62e-09	valine
4	89151444	rs62308058	A	T	0.305575	0.05837	0.01013	8.52e-09	valine
4	89149570	rs9307048	T	C	0.264334	0.062742	0.010942	1.01e-08	valine
4	89148785	rs9985959	T	C	0.268718	0.064884	0.010422	4.95e-10	valine
4	89148711	rs9986107	C	T	0.268712	0.064894	0.010422	4.92e-10	valine
4	89148439	rs28667581	G	T	0.268583	0.064926	0.010423	4.84e-10	valine
4	89143417	rs7655596	A	C	0.268188	0.065408	0.010435	3.78e-10	valine
4	89142276	rs12331057	G	A	0.268238	0.06557	0.010436	3.43e-10	valine
4	89166627	rs56011312	T	C	0.201808	0.066262	0.011735	1.68e-08	valine
4	89166761	rs7656569	A	C	0.202082	0.066694	0.011742	1.38e-08	valine
4	89123526	rs116017006	G	A	0.26825	0.069436	0.01055	4.82e-11	valine
2	65213822	rs10194107	C	T	0.741804	0.074329	0.010783	5.67e-12	valine
2	65221184	rs1541580	T	C	0.738166	0.074542	0.011193	2.84e-11	valine
17	7073014	rs12945886	G	A	0.268254	0.074591	0.012484	2.37e-09	valine
17	7073747	rs72837687	A	G	0.241097	0.074672	0.012638	3.55e-09	valine
17	7074125	rs62061426	A	G	0.242342	0.074773	0.012632	3.32e-09	valine
17	7073091	rs62061425	G	A	0.241274	0.074881	0.012644	3.26e-09	valine
17	7074718	rs67143157	G	A	0.277696	0.074903	0.01242	1.68e-09	valine
2	65219030	rs2007061	C	T	0.740854	0.075683	0.010759	2.08e-12	valine
17	7074061	rs28733475	G	C	0.272748	0.075856	0.012493	1.3e-09	valine
2	65215257	rs10170033	T	C	0.734392	0.075859	0.010641	1.05e-12	valine
17	7063899	rs56244095	A	C	0.240696	0.077009	0.012751	1.59e-09	valine
17	7063898	rs56115403	A	G	0.240726	0.07701	0.012751	1.59e-09	valine
17	7063815	rs56093546	A	T	0.243065	0.077381	0.012846	1.76e-09	valine
17	7063650	rs72837682	C	T	0.24263	0.077861	0.012844	1.38e-09	valine
17	7063667	rs7406661	C	T	0.243378	0.079073	0.012727	5.35e-10	valine
2	65220910	rs2160387	C	T	0.403416	0.086252	0.009564	2.02e-19	valine
2	65208074	rs10211524	A	G	0.40991	0.086403	0.009427	5.24e-20	valine
2	65231806	rs2422358	T	A	0.436486	0.087483	0.010293	2.02e-17	valine
4	89236735	rs893970	C	T	0.447052	0.089959	0.010116	6.3e-19	valine
4	89233397	rs1975393	T	C	0.478565	0.096894	0.009319	2.72e-25	valine
4	89230502	rs28789746	C	T	0.37346	0.097707	0.009581	2.17e-24	valine
4	89232572	rs1595910	T	C	0.373629	0.097969	0.009612	2.3e-24	valine
11	116640237	rs6589565	G	A	0.926113	0.098329	0.017235	1.19e-08	valine
11	116611733	rs9326246	G	C	0.926041	0.098377	0.017279	1.28e-08	valine
11	116639104	rs10790162	G	A	0.926101	0.098594	0.017244	1.11e-08	valine
11	116624727	rs7930786	G	C	0.926057	0.099082	0.017254	9.58e-09	valine
4	89228383	rs7660693	C	T	0.46696	0.09921	0.009243	7.61e-27	valine
11	116624153	rs6589564	G	C	0.926307	0.099391	0.017269	8.87e-09	valine
11	116647607	rs2160669	T	C	0.924452	0.099513	0.017094	5.99e-09	valine
11	116631707	rs3825041	C	T	0.92634	0.099579	0.017249	7.99e-09	valine
11	116652491	rs7483863	G	A	0.923683	0.099656	0.017089	5.64e-09	valine
4	89235870	rs28504259	G	C	0.331035	0.099759	0.010003	2.14e-23	valine
11	116652423	rs6589566	A	G	0.924616	0.100087	0.017107	5.03e-09	valine
11	116586283	rs7350481	C	T	0.927391	0.100137	0.017636	1.4e-08	valine
11	116607437	rs1558861	T	C	0.926307	0.100216	0.017342	7.72e-09	valine
11	116607368	rs1558860	C	A	0.926433	0.100328	0.017353	7.59e-09	valine
4	89228928	rs6841731	A	G	0.470606	0.100824	0.009206	7.01e-28	valine
11	116653296	rs2075290	T	C	0.924293	0.100898	0.01711	3.81e-09	valine
4	89231404	rs4693947	G	A	0.471011	0.101027	0.00925	9.77e-28	valine
4	89234812	rs1808859	C	T	0.391061	0.101058	0.009652	1.27e-25	valine
11	116660686	rs2266788	A	G	0.924748	0.101095	0.01715	3.86e-09	valine
4	89232772	rs28762810	T	G	0.47059	0.10112	0.009274	1.2e-27	valine
4	89233276	rs1975394	T	C	0.470656	0.101397	0.009287	1.02e-27	valine
11	116656788	rs10750096	A	C	0.924612	0.101605	0.017161	3.29e-09	valine
11	116662579	rs651821	T	C	0.927031	0.102358	0.017616	6.4e-09	valine
4	89231125	rs9998450	C	G	0.323211	0.10322	0.009899	1.99e-25	valine
4	89231823	rs28884607	A	G	0.32324	0.10333	0.009912	2.05e-25	valine
4	89232425	rs1595911	A	C	0.32372	0.103435	0.009923	2.08e-25	valine
4	89227918	rs7677533	A	G	0.323161	0.103497	0.009864	1.01e-25	valine
4	89231955	rs6532063	C	T	0.324039	0.103539	0.00992	1.81e-25	valine
4	89204093	rs17732955	T	C	0.295294	0.103732	0.010658	2.33e-22	valine
4	89234053	rs11945820	G	A	0.323518	0.103774	0.009954	2.05e-25	valine
11	116663707	rs662799	A	G	0.926951	0.103785	0.017708	4.73e-09	valine
4	89227121	rs17789621	T	C	0.322946	0.104053	0.009862	5.4e-26	valine
4	89219645	rs10024717	A	G	0.32887	0.104302	0.009792	1.84e-26	valine
11	116661826	rs2072560	C	T	0.928539	0.104738	0.017688	3.28e-09	valine
4	89220352	rs28504612	A	G	0.328257	0.105476	0.009798	5.44e-27	valine
4	89207156	rs7680307	C	T	0.259346	0.105566	0.011637	1.24e-19	valine
4	89210312	rs6838172	A	G	0.319767	0.105946	0.009911	1.23e-26	valine
4	89223058	rs13151250	A	G	0.328612	0.106574	0.009812	1.88e-27	valine
4	89215816	rs28406500	C	G	0.364595	0.106578	0.009565	8.46e-29	valine
4	89224185	rs28375859	A	G	0.328389	0.106667	0.009816	1.79e-27	valine
4	89224337	rs11931633	A	C	0.328356	0.106673	0.009817	1.81e-27	valine
4	89229337	rs1899132	A	G	0.496173	0.106848	0.009203	3.95e-31	valine
4	89206756	rs4423843	G	A	0.380305	0.106853	0.009425	9.3e-30	valine
4	89213077	rs34813495	G	A	0.365727	0.106869	0.009518	3.23e-29	valine
4	89214071	rs7655241	A	G	0.365426	0.10693	0.009533	3.64e-29	valine
4	89211522	rs6845249	T	C	0.368963	0.107214	0.009512	1.97e-29	valine
4	89210605	rs13128713	C	T	0.36593	0.107238	0.009518	2.06e-29	valine
4	89203670	rs893971	G	A	0.379666	0.107263	0.009417	5.04e-30	valine
4	89201376	rs2869926	T	C	0.379954	0.107529	0.009417	3.65e-30	valine
4	89197519	rs6819344	A	C	0.379786	0.107874	0.009438	3.23e-30	valine
4	89193640	rs17789147	G	C	0.379708	0.1079	0.009448	3.58e-30	valine
4	89192792	rs6821589	G	A	0.378932	0.108134	0.009466	3.45e-30	valine
4	89195540	rs34752329	A	G	0.369462	0.108803	0.009618	1.23e-29	valine
4	89226422	rs1440581	C	T	0.496626	0.108827	0.009219	3.99e-32	valine
4	89225171	rs10018448	G	A	0.498778	0.109496	0.009229	1.98e-32	valine
4	89226747	rs1440580	A	T	0.481422	0.109556	0.009362	1.34e-31	valine
4	89234709	rs1808860	C	T	0.436001	0.110035	0.009482	4.24e-31	valine
4	89223504	rs10014755	G	A	0.491812	0.111705	0.009245	1.42e-33	valine
4	89225088	rs9995984	G	C	0.445483	0.11179	0.009342	5.82e-33	valine
4	89208565	rs4693210	G	A	0.426689	0.112599	0.009293	9.33e-34	valine
4	89209681	rs958325	T	C	0.455779	0.112892	0.009203	1.5e-34	valine
4	89188993	rs6843634	A	G	0.426363	0.11301	0.009328	9.64e-34	valine
4	89181841	rs17789027	G	A	0.384124	0.113182	0.009507	1.21e-32	valine
4	89196821	rs7656367	G	A	0.469323	0.113706	0.009163	2.55e-35	valine
4	89201007	rs7661312	G	T	0.46892	0.113752	0.009846	7.73e-31	valine
4	89206230	rs9637599	C	A	0.46958	0.113927	0.009156	1.67e-35	valine
4	89187068	rs4693209	C	G	0.46987	0.114631	0.009217	1.79e-35	valine
4	89222827	rs7678928	T	C	0.42561	0.116233	0.009351	1.96e-35	valine
4	89203042	rs881561	A	G	0.377048	0.118967	0.009843	1.37e-33	valine
16	49085649	rs1420601	C	T	0.4	0.07	0.013	3.7e-08	isoleucine
14	104008420	rs58101275	G	A	0.79	0.09	0.015	2.8e-08	isoleucine
4	89222827	rs7678928	T	C	0.46	0.09	0.013	5.6e-19	isoleucine
2	27730940	rs1260326	T	C	0.41	0.06	0.012	1.1e-09	isoleucine
4	89226422	rs1440581	C	T	0.53	0.08	0.013	3.9e-25	leucine
4	89226422	rs1440581	C	T	0.53	0.1	0.013	4.4e-24	valine
16	70378917	rs75950518	C	T	0.89	0.11	0.19	2.1e-08	isoleucine
