# Supplementary material for: Mendelian Randomization Analysis Provides Insights into the Pathogenesis of Serum Levels of Branched-Chain Amino Acids in Cardiovascular Disease
Source: Metabolites. 2023 Mar 9;13(3):403. doi: 10.3390/metabo13030403 (PMC10059809; doi:10.3390/metabo13030403)
Supplement: Supplementary file 1 [file metabolites-13-00403-s001.zip › Supplemetary_data_2_mQTL.xlsx]

## Sheet: Sheet1
Supplementary Data 2.mQTL analysis and candidate SNPs identification for BCAA.
Timepoint	SNP	SNP Chr	SNP Pos	A1	A2	MAF	CpG	CpG Chr	CpG Pos	beta	t-stat	Effect Size	p-value	Trans
Adolescence	rs13030345	2	28003174	T	G	0.178	cg02592271	2	27665507	0.31246	5.56764	0.01969	3.48e-08	N
Adolescence	rs1919128	2	27801759	G	A	0.273	cg14242246	2	27434262	-0.26775	-6.0187	0.01786	2.63e-09	N
Adolescence	rs58101275	14	104008420	A	G	0.213	cg07514618	14	103979422	-0.36801	-7.23286	0.01396	1.07e-12	N
Adolescence	rs58101275	14	104008420	A	G	0.213	cg26031613	14	104095156	0.65554	12.9469	0.00359	4.53e-35	N
Adolescence	rs58101275	14	104008420	A	G	0.213	cg23335576	14	104009727	0.29011	5.96514	0.02258	3.61e-09	N
Adolescence	rs7656569	4	89166761	A	C	0.161	cg24592513	4	89099589	-0.29809	-6.39531	0.00291	2.66e-10	N
Adolescence	rs7680307	4	89207156	C	T	0.27	cg20103843	19	9577374	-0.21944	-5.37741	0.01422	9.82e-08	Y
Adolescence	rs1919128	2	27801759	G	A	0.273	cg18428193	2	27665017	0.41544	9.07543	0.05225	7.99e-19	N
Adolescence	rs1919128	2	27801759	G	A	0.273	cg27432699	2	27873401	0.28795	7.91449	0.03327	7.88e-15	N
Adolescence	rs1919128	2	27801759	G	A	0.273	cg24768116	2	27665128	0.36782	7.91021	0.02883	8.14e-15	N
Adolescence	rs1919128	2	27801759	G	A	0.273	cg12648201	2	27665141	0.35023	7.55607	0.0467	1.09e-13	N
Adolescence	rs7680307	4	89207156	C	T	0.27	cg03134083	1	175525244	-0.21917	-5.56562	0.00448	3.52e-08	Y
Adolescence	rs58101275	14	104008420	A	G	0.213	cg13617904	14	104182945	-0.30417	-6.18374	0.01087	9.79e-10	N
Adolescence	rs58101275	14	104008420	A	G	0.213	cg26002218	14	103986227	-0.31255	-6.06367	0.03179	2.01e-09	N
Adolescence	rs58101275	14	104008420	A	G	0.213	cg12935359	14	103987150	-0.7672	-15.8075	0.04529	1.95e-49	N
Adolescence	rs1919128	2	27801759	G	A	0.273	cg04845466	2	27665079	0.48331	10.5688	0.01901	1.37e-24	N
Adolescence	rs13030345	2	28003174	T	G	0.178	cg17158414	2	27665306	0.32226	5.82272	0.02153	8.26e-09	N
Adolescence	rs13030345	2	28003174	T	G	0.178	cg27432699	2	27873401	0.41073	9.83766	0.07986	1.11e-21	N
Adolescence	rs1919128	2	27801759	G	A	0.273	cg21248554	2	27665150	0.39909	8.66724	0.05811	2.28e-17	N
Adolescence	rs1919128	2	27801759	G	A	0.273	cg11618577	2	27665543	0.42829	9.23127	0.01346	2.15e-19	N
Adolescence	rs7680307	4	89207156	C	T	0.27	cg12192112	5	95469201	-0.19641	-5.64733	0.00704	2.23e-08	Y
Adolescence	rs1919128	2	27801759	G	A	0.273	cg02592271	2	27665507	0.45229	9.76639	0.02547	2.08e-21	N
Adolescence	rs1919128	2	27801759	G	A	0.273	cg26034919	2	27665711	0.31353	6.64353	0.04744	5.52e-11	N
Adolescence	rs1919128	2	27801759	G	A	0.273	cg12000995	2	27665139	0.38086	8.15638	0.06795	1.26e-15	N
Adolescence	rs58101275	14	104008420	A	G	0.213	cg16497661	14	103986332	-0.5032	-9.51944	0.01028	1.82e-20	N
Adolescence	rs58101275	14	104008420	A	G	0.213	cg18984103	14	104163025	-0.45236	-8.98656	0.05685	1.67e-18	N
Adolescence	rs1919128	2	27801759	G	A	0.273	cg17158414	2	27665306	0.44254	9.66291	0.02856	5.19e-21	N
Adolescence	rs58101275	14	104008420	A	G	0.213	cg02256455	14	104165475	-0.48367	-9.89614	0.02837	6.57e-22	N
Adolescence	rs58101275	14	104008420	A	G	0.213	cg21787568	14	104182951	-0.46781	-10.782	0.00411	1.82e-25	N
Adolescence	rs1919128	2	27801759	G	A	0.273	cg20102877	2	27665638	0.44649	9.63749	0.07068	6.49e-21	N
Adolescence	rs13030345	2	28003174	T	G	0.178	cg04845466	2	27665079	0.33626	6.03404	0.01236	2.4e-09	N
Adolescence	rs13030345	2	28003174	T	G	0.178	cg20102877	2	27665638	0.30862	5.50217	0.06205	4.99e-08	N
Birth	rs13030345	2	28003174	T	G	0.18	cg21248554	2	27665150	0.31084	5.46946	0.0577	6.11e-08	N
Birth	rs1919128	2	27801759	G	A	0.272	cg04845466	2	27665079	0.47903	10.0475	0.0112	2.11e-22	N
Birth	rs58101275	14	104008420	A	G	0.216	cg02256455	14	104165475	-0.3751	-7.52415	0.02787	1.48e-13	N
Birth	rs13030345	2	28003174	T	G	0.18	cg20102877	2	27665638	0.31429	5.46584	0.05383	6.23e-08	N
Birth	rs1919128	2	27801759	G	A	0.272	cg18428193	2	27665017	0.4149	8.63473	0.04958	3.37e-17	N
Birth	rs1919128	2	27801759	G	A	0.272	cg24768116	2	27665128	0.42626	8.67939	0.02023	2.36e-17	N
Birth	rs1919128	2	27801759	G	A	0.272	cg12000995	2	27665139	0.3876	7.90789	0.05351	9.09e-15	N
Birth	rs58101275	14	104008420	A	G	0.216	cg26031613	14	104095156	0.59805	12.0228	0.00505	1.24e-30	N
Birth	rs13030345	2	28003174	T	G	0.18	cg11618577	2	27665543	0.33227	5.8829	0.00684	6.01e-09	N
Birth	rs1919128	2	27801759	G	A	0.272	cg01744354	2	27712243	-0.26138	-5.67826	0.00303	1.93e-08	N
Birth	rs13030345	2	28003174	T	G	0.18	cg02592271	2	27665507	0.40836	7.1544	0.02491	1.96e-12	N
Birth	rs1919128	2	27801759	G	A	0.272	cg17158414	2	27665306	0.37222	7.78934	0.02639	2.18e-14	N
Birth	rs13030345	2	28003174	T	G	0.18	cg04845466	2	27665079	0.39088	6.88147	0.01039	1.23e-11	N
Birth	rs1919128	2	27801759	G	A	0.272	cg11618577	2	27665543	0.39821	8.30951	0.0094	4.33e-16	N
Birth	rs1919128	2	27801759	G	A	0.272	cg20102877	2	27665638	0.41958	8.65587	0.06164	2.85e-17	N
Birth	rs7656569	4	89166761	A	C	0.164	cg24207176	4	89079587	0.31289	5.64851	0.00281	2.28e-08	N
Birth	rs58101275	14	104008420	A	G	0.216	cg18984103	14	104163025	-0.36012	-7.31174	0.03032	6.63e-13	N
Birth	rs13030345	2	28003174	T	G	0.18	cg17158414	2	27665306	0.32673	5.82821	0.02442	8.24e-09	N
Birth	rs58101275	14	104008420	A	G	0.216	cg21787568	14	104182951	-0.41348	-9.31158	0.00369	1.29e-19	N
Birth	rs1919128	2	27801759	G	A	0.272	cg26034919	2	27665711	0.27971	5.61959	0.05776	2.68e-08	N
Birth	rs58101275	14	104008420	A	G	0.216	cg12935359	14	103987150	-0.89635	-19.8331	0.05675	5.12e-71	N
Birth	rs1919128	2	27801759	G	A	0.272	cg02592271	2	27665507	0.46028	9.52897	0.02431	2.02e-20	N
Birth	rs1919128	2	27801759	G	A	0.272	cg27432699	2	27873401	0.23125	6.54052	0.04269	1.12e-10	N
Birth	rs13030345	2	28003174	T	G	0.18	cg18428193	2	27665017	0.32742	5.75744	0.03667	1.23e-08	N
Birth	rs1919128	2	27801759	G	A	0.272	cg12648201	2	27665141	0.33905	7.4439	0.03062	2.62e-13	N
Birth	rs58101275	14	104008420	A	G	0.216	cg26938255	14	103997249	-0.30862	-5.70072	0.10309	1.7e-08	N
Birth	rs1919128	2	27801759	G	A	0.272	cg21248554	2	27665150	0.42492	8.89045	0.07628	4.28e-18	N
Birth	rs13030345	2	28003174	T	G	0.18	cg27432699	2	27873401	0.3006	7.42219	0.0568	3.06e-13	N
Birth	rs58101275	14	104008420	A	G	0.216	cg13617904	14	104182945	-0.34067	-6.68929	0.01074	4.32e-11	N
Childhood	rs13030345	2	28003174	T	G	0.18	cg02592271	2	27665507	0.31812	5.89083	0.01787	5.58e-09	N
Childhood	rs58101275	14	104008420	A	G	0.217	cg08213375	14	104286397	-0.31182	-5.97272	0.00602	3.45e-09	N
Childhood	rs13030345	2	28003174	T	G	0.18	cg18428193	2	27665017	0.33435	6.18839	0.04039	9.53e-10	N
Childhood	rs58101275	14	104008420	A	G	0.217	cg16497661	14	103986332	-0.60468	-12.1204	0.01413	2.98e-31	N
Childhood	rs7656569	4	89166761	A	C	0.163	cg24207176	4	89079587	0.34261	6.30451	0.00445	4.69e-10	N
Childhood	rs13030345	2	28003174	T	G	0.18	cg04845466	2	27665079	0.33311	6.17414	0.01386	1.04e-09	N
Childhood	rs1919128	2	27801759	G	A	0.276	cg12000995	2	27665139	0.32222	7.02987	0.06155	4.31e-12	N
Childhood	rs1919128	2	27801759	G	A	0.276	cg27432699	2	27873401	0.26213	7.50392	0.03526	1.59e-13	N
Childhood	rs13030345	2	28003174	T	G	0.18	cg16700650	16	69344975	0.26242	5.65288	0.00482	2.17e-08	Y
Childhood	rs1919128	2	27801759	G	A	0.276	cg04845466	2	27665079	0.43725	9.75872	0.01632	2.25e-21	N
Childhood	rs58101275	14	104008420	A	G	0.217	cg26938255	14	103997249	-0.29268	-5.68605	0.05776	1.8e-08	N
Childhood	rs13030345	2	28003174	T	G	0.18	cg17158414	2	27665306	0.32851	5.96371	0.01852	3.64e-09	N
Childhood	rs7656569	4	89166761	A	C	0.163	cg24592513	4	89099589	-0.27327	-5.82591	0.00219	8.12e-09	N
Childhood	rs1919128	2	27801759	G	A	0.276	cg18428193	2	27665017	0.43728	9.74285	0.047	2.59e-21	N
Childhood	rs1919128	2	27801759	G	A	0.276	cg12648201	2	27665141	0.30561	6.73264	0.04476	3.1e-11	N
Childhood	rs13030345	2	28003174	T	G	0.18	cg27432699	2	27873401	0.36402	9.06272	0.04298	8.94e-19	N
Childhood	rs58101275	14	104008420	A	G	0.217	cg02256455	14	104165475	-0.48231	-10.2145	0.03124	3.71e-23	N
Childhood	rs1919128	2	27801759	G	A	0.276	cg17158414	2	27665306	0.41667	9.0561	0.02417	9.45e-19	N
Childhood	rs1919128	2	27801759	G	A	0.276	cg14242246	2	27434262	-0.26541	-5.94292	0.01774	4.11e-09	N
Childhood	rs58101275	14	104008420	A	G	0.217	cg18984103	14	104163025	-0.48073	-10.3052	0.061	1.61e-23	N
Childhood	rs13030345	2	28003174	T	G	0.18	cg20102877	2	27665638	0.3028	5.4673	0.05121	6.04e-08	N
Childhood	rs1919128	2	27801759	G	A	0.276	cg24768116	2	27665128	0.30378	6.64263	0.02995	5.56e-11	N
Childhood	rs1919128	2	27801759	G	A	0.276	cg02592271	2	27665507	0.44986	10.0854	0.02475	1.2e-22	N
Childhood	rs58101275	14	104008420	A	G	0.217	cg11829633	14	104273589	0.34269	7.20533	0.03377	1.3e-12	N
Childhood	rs58101275	14	104008420	A	G	0.217	cg26031613	14	104095156	0.63577	13.4608	0.00791	1.65e-37	N
Childhood	rs58101275	14	104008420	A	G	0.217	cg12935359	14	103987150	-0.76041	-16.2653	0.01256	7.36e-52	N
Childhood	rs58101275	14	104008420	A	G	0.217	cg25561904	14	104165401	-0.29634	-5.87246	0.02606	6.2e-09	N
Childhood	rs1919128	2	27801759	G	A	0.276	cg11618577	2	27665543	0.40936	8.90975	0.01223	3.18e-18	N
Childhood	rs1919128	2	27801759	G	A	0.276	cg20102877	2	27665638	0.43166	9.39394	0.06933	5.41e-20	N
Childhood	rs1919128	2	27801759	G	A	0.276	cg26034919	2	27665711	0.26981	5.90633	0.05084	5.1e-09	N
Childhood	rs1919128	2	27801759	G	A	0.276	cg21248554	2	27665150	0.32665	7.27813	0.05561	7.84e-13	N
Childhood	rs58101275	14	104008420	A	G	0.217	cg21787568	14	104182951	-0.37672	-9.27581	0.0059	1.48e-19	N
Middle Age	rs58101275	14	104008420	A	G	0.214	cg13617904	14	104182945	-0.33049	-6.60325	0.01182	7.68e-11	N
Middle Age	rs17732955	4	89204093	T	C	0.316	cg23706819	4	89152212	0.25396	5.62983	0.02891	2.56e-08	N
Middle Age	rs1919128	2	27801759	G	A	0.27	cg12000995	2	27665139	0.41882	8.60174	0.04722	4.67e-17	N
Middle Age	rs1919128	2	27801759	G	A	0.27	cg05102552	2	27650867	0.26834	5.68774	0.00223	1.85e-08	N
Middle Age	rs58101275	14	104008420	A	G	0.214	cg16497661	14	103986332	-0.45069	-8.43966	0.00691	1.67e-16	N
Middle Age	rs13030345	2	28003174	T	G	0.184	cg20102877	2	27665638	0.33679	5.81454	0.04229	9.04e-09	N
Middle Age	rs1919128	2	27801759	G	A	0.27	cg12648201	2	27665141	0.41934	8.57195	0.04291	5.91e-17	N
Middle Age	rs1919128	2	27801759	G	A	0.27	cg21248554	2	27665150	0.44609	9.15303	0.04424	5.3e-19	N
Middle Age	rs13030345	2	28003174	T	G	0.184	cg11618577	2	27665543	0.35149	5.96904	0.01103	3.7e-09	N
Middle Age	rs58101275	14	104008420	A	G	0.214	cg02256455	14	104165475	-0.43271	-9.41849	0.03042	5.69e-20	N
Middle Age	rs1919128	2	27801759	G	A	0.27	cg20102877	2	27665638	0.41819	8.50389	0.05593	1.01e-16	N
Middle Age	rs58101275	14	104008420	A	G	0.214	cg23335576	14	104009727	0.28543	5.53594	0.02212	4.3e-08	N
Middle Age	rs58101275	14	104008420	A	G	0.214	cg11829633	14	104273589	0.28236	5.61458	0.03635	2.79e-08	N
Middle Age	rs1919128	2	27801759	G	A	0.27	cg27432699	2	27873401	0.28093	6.95394	0.03813	7.82e-12	N
Middle Age	rs13030345	2	28003174	T	G	0.184	cg12648201	2	27665141	0.32693	5.66352	0.00981	2.12e-08	N
Middle Age	rs1919128	2	27801759	G	A	0.27	cg04845466	2	27665079	0.46577	9.67638	0.02246	6.2e-21	N
Middle Age	rs58101275	14	104008420	A	G	0.214	cg26002218	14	103986227	-0.28898	-5.66534	0.05613	2.1e-08	N
Middle Age	rs13030345	2	28003174	T	G	0.184	cg21248554	2	27665150	0.35839	6.21917	0.01436	8.35e-10	N
Middle Age	rs58101275	14	104008420	A	G	0.214	cg21787568	14	104182951	-0.43046	-9.17126	0.00693	4.56e-19	N
Middle Age	rs1919128	2	27801759	G	A	0.27	cg18428193	2	27665017	0.41592	8.41815	0.03405	1.97e-16	N
Middle Age	rs1919128	2	27801759	G	A	0.27	cg02592271	2	27665507	0.44429	9.0096	0.02473	1.74e-18	N
Middle Age	rs13030345	2	28003174	T	G	0.184	cg27432699	2	27873401	0.40932	8.99338	0.06259	1.98e-18	N
Middle Age	rs1919128	2	27801759	G	A	0.27	cg24768116	2	27665128	0.40551	8.39257	0.02707	2.41e-16	N
Middle Age	rs58101275	14	104008420	A	G	0.214	cg12935359	14	103987150	-0.81466	-16.3191	0.05217	2.28e-51	N
Middle Age	rs13030345	2	28003174	T	G	0.184	cg24768116	2	27665128	0.34014	5.99183	0.01903	3.24e-09	N
Middle Age	rs13030345	2	28003174	T	G	0.184	cg17158414	2	27665306	0.31932	5.52483	0.00814	4.57e-08	N
Middle Age	rs58101275	14	104008420	A	G	0.214	cg18984103	14	104163025	-0.43782	-8.50544	0.04749	9.97e-17	N
Middle Age	rs58101275	14	104008420	A	G	0.214	cg26031613	14	104095156	0.64471	12.4841	0.00296	1.36e-32	N
Middle Age	rs13030345	2	28003174	T	G	0.184	cg04845466	2	27665079	0.34326	5.98438	0.01798	3.38e-09	N
Middle Age	rs145585828	4	89219170	A	C	0.016	cg25518695	Y	16636258	-0.12716	-5.39849	0	9.06e-08	Y
Middle Age	rs1919128	2	27801759	G	A	0.27	cg17158414	2	27665306	0.44746	9.2081	0.01533	3.35e-19	N
Middle Age	rs13030345	2	28003174	T	G	0.184	cg12000995	2	27665139	0.34237	5.97091	0.02459	3.66e-09	N
Middle Age	rs1919128	2	27801759	G	A	0.27	cg11618577	2	27665543	0.43844	8.78579	0.01456	1.07e-17	N
Middle Age	rs13030345	2	28003174	T	G	0.184	cg02592271	2	27665507	0.33444	5.72291	0.01258	1.52e-08	N
Middle Age	rs13030345	2	28003174	T	G	0.184	cg18428193	2	27665017	0.33182	5.70224	0.02477	1.71e-08	N
Middle Age	rs7680307	4	89207156	C	T	0.273	cg26925064	5	80689796	-0.22294	-5.49165	0.00144	5.48e-08	Y
Middle Age	rs58101275	14	104008420	A	G	0.214	cg21845957	14	103988428	-0.26532	-5.46133	0.01293	6.46e-08	N
Pregnancy	rs13030345	2	28003174	T	G	0.185	cg12648201	2	27665141	0.31326	5.47201	0.05304	6.04e-08	N
Pregnancy	rs58101275	14	104008420	A	G	0.213	cg08213375	14	104286397	-0.35327	-6.68848	0.0091	4.36e-11	N
Pregnancy	rs58101275	14	104008420	A	G	0.213	cg25561904	14	104165401	-0.41062	-7.90174	0.01774	9.62e-15	N
Pregnancy	rs58101275	14	104008420	A	G	0.213	cg11829633	14	104273589	0.31188	6.19007	0.01778	9.82e-10	N
Pregnancy	rs58101275	14	104008420	A	G	0.213	cg12935359	14	103987150	-0.80371	-16.5969	0.04306	4.87e-53	N
Pregnancy	rs58101275	14	104008420	A	G	0.213	cg02256455	14	104165475	-0.55409	-11.1363	0.0297	8.59e-27	N
Pregnancy	rs58101275	14	104008420	A	G	0.213	cg16497661	14	103986332	-0.61799	-12.0595	0.01094	8.98e-31	N
Pregnancy	rs1919128	2	27801759	G	A	0.269	cg21248554	2	27665150	0.44736	9.03327	0.07288	1.35e-18	N
Pregnancy	rs1919128	2	27801759	G	A	0.269	cg12000995	2	27665139	0.46844	9.54853	0.08352	1.74e-20	N
Pregnancy	rs58101275	14	104008420	A	G	0.213	cg13617904	14	104182945	-0.35724	-7.05844	0.00579	3.79e-12	N
Pregnancy	rs58101275	14	104008420	A	G	0.213	cg26938255	14	103997249	-0.37845	-7.14284	0.10793	2.14e-12	N
Pregnancy	rs1919128	2	27801759	G	A	0.269	cg18428193	2	27665017	0.43087	9.11351	0.05218	6.93e-19	N
Pregnancy	rs1919128	2	27801759	G	A	0.269	cg27432699	2	27873401	0.29897	7.42751	0.04472	2.97e-13	N
Pregnancy	rs1919128	2	27801759	G	A	0.269	cg26034919	2	27665711	0.28428	5.75041	0.04361	1.29e-08	N
Pregnancy	rs1919128	2	27801759	G	A	0.269	cg24768116	2	27665128	0.43541	8.96436	0.03378	2.38e-18	N
Pregnancy	rs13030345	2	28003174	T	G	0.185	cg04845466	2	27665079	0.37833	6.72763	0.01803	3.39e-11	N
Pregnancy	rs58101275	14	104008420	A	G	0.213	cg21787568	14	104182951	-0.46191	-9.99847	0.00661	3.36e-22	N
Pregnancy	rs58101275	14	104008420	A	G	0.213	cg26031613	14	104095156	0.64465	12.856	0.00291	2.24e-34	N
Pregnancy	rs1919128	2	27801759	G	A	0.269	cg04845466	2	27665079	0.50583	10.5568	0.02063	2.08e-24	N
Pregnancy	rs1919128	2	27801759	G	A	0.269	cg12648201	2	27665141	0.43952	8.93091	0.06095	3.13e-18	N
Pregnancy	rs13030345	2	28003174	T	G	0.185	cg20102877	2	27665638	0.32789	5.81796	0.05951	8.77e-09	N
Pregnancy	rs1919128	2	27801759	G	A	0.269	cg02592271	2	27665507	0.4375	8.90012	0.03014	4.02e-18	N
Pregnancy	rs13030345	2	28003174	T	G	0.185	cg27432699	2	27873401	0.37831	8.40863	0.0535	2.03e-16	N
Pregnancy	rs1919128	2	27801759	G	A	0.269	cg17158414	2	27665306	0.37871	7.76607	0.02443	2.61e-14	N
Pregnancy	rs58101275	14	104008420	A	G	0.213	cg26002218	14	103986227	-0.29835	-5.7241	0.0412	1.5e-08	N
Pregnancy	rs58101275	14	104008420	A	G	0.213	cg23335576	14	104009727	0.29614	6.15409	0.01554	1.22e-09	N
Pregnancy	rs13030345	2	28003174	T	G	0.185	cg18428193	2	27665017	0.29985	5.44039	0.04309	7.17e-08	N
Pregnancy	rs1919128	2	27801759	G	A	0.269	cg20102877	2	27665638	0.42919	8.82728	0.06488	7.27e-18	N
Pregnancy	rs13030345	2	28003174	T	G	0.185	cg12000995	2	27665139	0.34101	5.95616	0.08639	3.94e-09	N
Pregnancy	rs58101275	14	104008420	A	G	0.213	cg18984103	14	104163025	-0.53985	-10.5512	0.04659	2.19e-24	N
Pregnancy	rs1919128	2	27801759	G	A	0.269	cg11618577	2	27665543	0.40686	8.14619	0.02045	1.53e-15	N
